# Supplementary material for: Three odorant-binding proteins are involved in the behavioral response of Sogatella furcifera to rice plant volatiles
Source: PeerJ. 2019 Mar 7;7:e6576. doi: 10.7717/peerj.6576 (PMC6409085; doi:10.7717/peerj.6576)
Supplement: File S1 [file peerj-07-6576-s001.docx]

**Table S1. Primers used in this study**

| **Purpose** | **Primer Name** | **Gene ID** | **Primer (5’→3’)** | **E (%)** | **R2** |
| --- | --- | --- | --- | --- | --- |
| Bacterial expression | *SfurOBP1*-F | KF732013 | AAGGATCCGACGAGGCGACGTCGTCATC1 | n.a. | n.a. |
| *SfurOBP1*-R |  | GGAAGCTTTTAGGCTTTGGGGAAGAAGTTTATC2 |  |  |
| *SfurOBP2*-F | KF660218 | AAGGATCCAGTCCGGCATTAACTGAAGC1 | n.a. | n.a. |
| *SfurOBP2*-R |  | GGAAGCTTTCAGAAGTTGAAGAAGAATGGATT2 |  |  |
| *SfurOBP3*-F | KF732014 | AAGGATCCAAAATTGACAAGGCCAAGAAGG1 | n.a. | n.a. |
| *SfurOBP3*-R |  | GGAAGCTTCTAAACATCGAAGTCGTCCTTCAT2 |  |  |
| *SfurOBP11*-F | KF732020 | AAGGATCCGGTCTCACCCCAGAAAAACTCA1 | n.a. | n.a. |
| *SfurOBP11*-R |  | GGAAGCTTTCAGTTCATACCAGCAAGCTCAG2 |  |  |
| qPCR | *SfurOBP2*-F |  | ATTCGAGCCAGCCATGACAA | 110.0 | 0.999 |
| *SfurOBP2*-R |  | TGAAGCAATCATCCACGGCT |  |  |
| *SfurOBP3*-F |  | GCCAAGAAGGAGGCCGCTAT | 107.7 | 0.969 |
| *SfurOBP3*-R |  | ATCCACAGGCGATGAAGCAC |  |  |
| *SfurOBP11*-F |  | CAGCGACAGTATATGGGCGA | 105.2 | 0.996 |
| *SfurOBP11*-R |  | GTCACCATTGGTCGCTTTGTT |  |  |
| *SfurTUB*-F | KP735521 | GAGGACACTACACCATCGGC | 99.3 | 0.992 |
| *SfurTUB*-R |  | TCAACAGCGAGGTGAATCCG |  |  |
| *EF1α-*F | KP735517 | AAGATCGGTTACAACCCGGC | 103.8 | 0.989 |
| *EF1α-*R |  | TCCTTGCGCTCAATGTTCCA |  |  |
| RNAi | *SfurOBP2*-F |  | TAATACGACTCACTATAGGGTCTCACCCCAAACTCAAAG3 | n.a. | n.a. |
| *SfurOBP2*-R |  | TAATACGACTCACTATAGGGGAAGTCACTTGGAGAAGCTCTG3 |  |  |
| *SfurOBP3*-F |  | TAATACGACTCACTATAGGGCAGCATCTCTTACCCTCATTTTTCT3 | n.a. | n.a. |
| *SfurOBP3*-R |  | TAATACGACTCACTATAGGGGCAATCGTTCAATCCACTTACAG3 |  |  |
| *SfurOBP11*-F |  | TAATACGACTCACTATAGGGTTATACCGGCAAGTGTGTGTTC3 | n.a. | n.a. |
| *SfurOBP11*-R |  | TAATACGACTCACTATAGGGGCTCAAGTCGGAATGTCTATCAC3 |  |  |
| *EGFP*-F | U55762 | TAATACGACTCACTATAGGGAGGACGACGGCAACTACAAG3 | n.a. | n.a. |
| *EGFP*-R |  | TAATACGACTCACTATAGGGGTCCATGCCGAGAGTGATCC3 |  |  |

1The underlined sequence indicate the position of the BamH I endonuclease site; 2The underlined sequence indicate the position of the Hind III endonuclease site; 3T7 RNA polymerase promoter is underlined; n.a. = not applied.
