# Supplementary material for: Three odorant-binding proteins are involved in the behavioral response of Sogatella furcifera to rice plant volatiles
Source: PeerJ. 2019 Mar 7;7:e6576. doi: 10.7717/peerj.6576 (PMC6409085; doi:10.7717/peerj.6576)
Supplement: File S3 [file peerj-07-6576-s003.xlsx]

## Sheet: behavior
	Behavioral trials
		volatilies	hexane	failed
	2-heptanonol	16	13	13
	n-tetradecane	14	13	13
	n-nonadecane	15	13	12
	(+)-limonene	16	7	17
	linalool	14	14	12
	2-heptanone	21	8	11
	acetophenone	20	11	9
	benzoic acid methylester	9	10	20
	nonanal	17	12	11
	2-nonen-1-ol	18	12	10
	tridecanal	13	11	16
	octanal	8	15	17
	n-hendecane	18	8	14
	cyclohexanol	7	12	21
	(E)-2-hexenol	8	9	24
	n-octane	10	19	11
	nerolidol	15	13	12
	α-farnesene	25	10	5
	α-terpineol	11	14	15
	β-caryophyllene	16	15	9
	β-ionone	10	18	12
	4-isopropyltoluene	11	13	16
	benzaldehyde	7	10	23
	caproaldehyde	12	9	19
	(Z)-3-hexenol	13	13	14
	Behavioral trials after RNAi
	dsOBP3	β-Ionone	hexane	failed
		16	9	15
		α-farnesene	hexane	failed
		12	11	15
	dsOBP11	Plant alcohol	hexane	failed
		19	17	13
		β-Ionone	hexane	failed
		17	8	16
	dsOBP2	β-Ionone	hexane	failed
		13	14	15

## Sheet: RNAi
	RNAi	CQ
			Sfurobp3	Sfurobp2	SfurOBP11	ef-1α	TUB
		CK1	28.85	18.5894	19.8271	13.96	18.45
		CK1	28.64	18.4641	19.8246	13.87	18.49
		CK1	28.5	18.5086	19.4206	13.4	18.06
		CK2	28.37	18.7374	19.5399	14.37	17.75
		CK2	28.23	18.6915	19.394	14.03	17.97
		CK2	28.55	18.5267	19.4909	14.01	18.05
		CK3	29.47	19.1469	19.9605	15.93	18.31
		CK3	29.37	19.2985	19.8014	15.3	18.4
		CK3	29.55	19.071	20.1767	15.53	18.74
		E1	29.12	19.3243	20.107	14.73	19.08
		E1	29.31	19.322	20.2896	15.01	19.15
		E1	29.2	19.3474	20.2478	14.89	19.03
		E2	28.76	19.0434	20.1816	14.64	18.445
		E2	28.63	19.0822	19.4546	14.41	18.3
		E2	28.89	19.0745	19.9441	14.26	18.16
		E3	28.62	19.191	19.9452	14.39	19.14
		E3	28.94	19.1744	20.0282	14.25	18.91
		E3	28.74	19.0878	20.1445	14.09	18.75
		dsOBP11-1			22.2614	13.62	18.61
		dsOBP11-1			22.3464	13.93	18.61
		dsOBP11-1			22.4418	14.09	18.49
		dsOBP11-2			22.8904	13.58	18.07
		dsOBP11-2			22.6686	13.72	17.93
		dsOBP11-2			22.9267	13.4	18.24
		dsOBP11-3			23.2302	16.98	19.33
		dsOBP11-3			23.2929	17.05	19.1
		dsOBP11-3			23.3528	17.21	19.59
		dsOBP2-1		19.1981		14.03	17.67
		dsOBP2-1		19.3539		14.03	17.89
		dsOBP2-1		19.3921		14.14	17.56
		dsOBP2-2		19.8095		14.55	18.39
		dsOBP2-2		19.9757		14.46	18.26
		dsOBP2-2		19.9776		14.42	18.43
		dsOBP2-3		21.1467		14.5	19.33
		dsOBP2-3		21.2766		14.03	19.18
		dsOBP2-3		21.267		14.08	19.55
		dsOBP3-1	30.52			15.83	18.02
		dsOBP3-1	30.45			16.09	18.16
		dsOBP3-1	30.35			16.06	17.97
		dsOBP3-2	29.8			14.96	17.18
		dsOBP3-2	29.57			15.16	17.49
		dsOBP3-2	30.04			14.92	17.86
		dsOBP3-3	30.34			15.92	18.28
		dsOBP3-3	30.38			15.82	18.37
		dsOBP3-3	30.23			15.72	18.34

## Sheet: OBP-1-NPN
			Fluorescence intensity
		1-NPN	OBP1				OBP2				OBP3				OBP11
		0	2928	3103	3126		2575	3065	2730		5109	5118	4653		3279	3360	3796
		2	7934	7244	7558		23662	22289	22010		59650	61430	58985		34926	31369	32128
		4	14870	13520	13256		39603	44704	31870		80262	77503	80113		46136	60649	53421
		6	19450	20173	19826		50431	46158	47197		82776	85325	83919		59058	63562	67479
		8	25948	27851	26112		61337	63137	57001		85039	97386	97137		73431	79398	77472
		10	30874	31162	28910		59819	73730	69974		94167	98049	103605		83685	83190	84209
		12	33259	35914	35970						98958	100936	110967		87527	87829	87441
		14	37528	37617	40532		64863	65896	57584		103187	99019	113580		113208	119321	82397
		16	43674	43309	43505		70787	76872	65200		104178	114929	113428		121541	129453	101542
		18	50472	51665	48009		75833	70878	75400		116920	121020	111471		129684	132053	101150
		20	53471	53438	53794		67482	73624	78268		114937	114200	113028		142842	126669	108121
		22	54404	53461	54332		76334	74639	64277		110696	115221	112203		118001	129399	126785
		24	55616	55933	55336						112155	120756	110811		123359	122043	121686
		26	55005	58722	54776						115694	117527	109823
		28	60087	56565	53471						118918	107913	111968
		30	59000	55051	51066						116658	110746	113690

## Sheet: OBP1
		OBP1			Fluorescence competitive binding assay
		2			4			6			8			10			12			14			16			18			20
	BHT(2,6-di-tert-butyl-4-methylphenol)	6030	6058	6096	6092	6318	6150	6520	6547	6496	6548	6679	6600	6739	6709	6666	6775	6778	6802	6847	6906	6978	6943	7135	6900	7439	7058	7176	7203	7412	7729
	naphthalene	5483	5608	5501	5830	5745	5659	5799	5826	5942	6002	5983	5964	5834	6388	6102	6285	6121	6209	6231	6194	6297	6398	6743	6035	6548	7178	7195	7389	7177	6994
	lauryl alcohol	7624	6465	8545	7313	7318	7353	7143	7275	7922	7358	7784	8873	7141	7560	7926	7810	7463	8566	7736	8413	7236	8777	6935	7055	9193	9578	9152	11048	9816	8594
	didecyl ether	13439	10181	10387	12999	14054	13054	17843	17435	18755	20344	21618	19391	25143	20920	29597	25050	26471	24718	31790	28307	28799	25660	26360	27874	34663	37908	36994	37718	33824	31648
	benzophenone	4924	4810	4695	5262	5281	5299	5268	5717	5292	5360	5130	5580	5344	5432	5519	5178	5515	5347	5173	5557	5365	5828	4931	5380	5476	5297	5257	5039	5512	5595
	n-Hexadecane	5137	5021	5229	5910	6306	5547	6300	6430	6367	6419	6500	6466	6532	6517	6502	6620	6292	6471	6713	6503	6353	6541	6507	6533	7558	7106	6654	6949	7724	7337
	MH(methyl hexadecanoate)	12147	12451	12785	16267	16004	15123	22521	20565	17849	45300	22408	22243	28286	29968	28368	32121	35150	30012	38613	36070	36799	34740	38687	36378	40518	49298	40325	47871	41141	44944
	n-octadecane	9199	7453	7122	8077	8108	9442	8157	9511	12800	8086	8235	10013	9302	9657	9738	8567	10513	8676	10345	9766	9261	9156	9816	8326	11251	11486	11859	12749	11193	9024
	cedrol	6995	7876	8408	8498	11154	11504	10601	9220	11976	9019	11150	9994	10329	10734	11532	12388	11952	13123	12489	14285	14049	13812	12078	13153	15290	17034	15790	14831	15054	15511
	Plant alcohol	7330	7109	7550	7885	9070	8350	9355	9996	9183	11640	10265	9349	10389	10452	10917	10679	10989	10151	12105	10979	11552	10141	15672	8010	13868	12649	12554	12803	13119	10975
	DA(diisobutyl adipate)	6756	5373	6005	6244	6492	6739	6349	5828	6089	6071	5880	6063	6080	6185	6121	5959	5941	5922	6211	5589	5885	6060	6168	5508	6493	6572	6293	7139	6435	6856
	2-heptanonol	5887	5646	5767	7288	7577	6996	5995	5950	6027	7072	6140	5704	8690	6215	5653	7048	7677	6537	6232	8602	7115	5533	5298	5778	5895	6061	6136	5784	5580	5212
	n-tetradecane	6022	9475	7407	7163	8831	6832	9235	7734	8738	7490	9773	9402	10034	9701	9801	16511	14895	12657	9553	12263	10210	10515	10611	10617	11876	13682	11119	17922	11049	10258
	n-nonadecane	5361	5140	5582	6690	6608	6742	8870	9897	7869	7482	6593	11079	7327	7941	8862	8260	9027	8555	9439	7708	9780	8450	9204	7552	9810	13450	9951	10406	10007	8824
	(+)-limonene	5110	5104	5112	5716	6377	5308	6462	7662	6319	6113	5754	14807	5995	6375	7413	5970	7970	8226	5770	8418	5488	4972	5953	5038	6525	7403	8592	7343	8136	7739
	linalool	6084	5184	7029	5717	6456	6034	5873	6101	6679	5733	6957	6693	5847	5923	6121	6065	6137	6412	7822	5806	6262	5059	6382	5339	6537	6532	5815	6056	5740	5464
	2-heptanone	5565	5797	5680	6133	7369	7766	7319	6450	6758	6247	6677	6608	5974	6580	6200	6115	6844	6487	7227	6939	7296	7221	7791	6651	6902	6623	6730	6454	6429	6479
	acetophenone	5574	5550	5238	4710	5782	5020	5308	5201	5270	4498	4902	5186	4649	5445	5409	5039	5542	4835	5190	5205	6069	4320	5267	4703	5435	5537	6009	6807	4924	6337
	benzoic acid methylester	5064	4951	5158	5979	6427	5531	9023	8678	7700	8709	6440	6910	7708	6333	7083	5895	6787	5523	8915	6017	4981	7008	5157	5392	7131	8076	6232	6422	6546	6873
	nonanal	7802	7217	8367	10256	8383	7448	7755	7709	7657	8353	6725	6896	7309	7612	6541	7182	6932	8389	7695	6348	8106	7645	7087	7719	9286	8583	8604	13401	7898	7495
	2-nonen-1-ol	6522	6473	6498	5655	6432	6908	8453	7604	7714	8297	7919	6967	6386	8717	6918	6193	7108	6694	6199	6820	8443	5457	5916	5787	6097	9706	8104	6801	6290	6295
	tridecanal	7938	8209	9100	8199	9497	8248	9970	9490	9404	9879	9942	9021	11694	10870	12178	10792	13471	12081	13762	12603	7069	15566	12262	13672	13469	13374	13884	16296	16551	15519
	octanal	7113	7279	7196	8035	6567	6323	7198	8786	7995	8545	7731	8071	6799	7181	8487	7177	8788	7408	8520	7543	7998	7196	9418	8283	10247	9192	8904	10042	9521	8702
	n-hendecane	8889	7931	9847	9154	8432	9875	7581	8720	8173	8276	7641	8381	7644	8267	8233	8969	10263	9250	8392	9042	10874	8482	9466	8778	11781	12671	12573	13259	11367	9255
	cyclohexanol	5844	5673	6371	9311	8690	9932	6443	7058	7039	6837	7313	7729	8238	7697	7236	6489	6472	7355	7069	6354	7092	6030	6324	7260	9356	7906	7474	8046	8689	8368
	(E)-2-hexenol	5821	6205	6589	7444	7124	7270	8585	7896	9273	8091	7978	7865	8122	7477	6720	5971	6877	6423	6112	6019	6107	6252	5805	6056	8503	8229	10760	7495	8100	7787
	n-octane	5925	7991	7456	8340	7163	7902	8616	7456	8995	8020	7176	8029	7070	8613	8224	6680	8217	6786	7048	6801	7552	6817	7163	7002	8094	8514	8878	7869	7702	8440
	nerolidol	6708	6744	6934	6359	8427	6473	6867	6865	7375	8143	7305	8959	7362	11085	8523	6544	7094	6753	7135	7404	8089	5378	6818	6356	6689	7935	7391	6918	6511	6565
	α-farnesene	5991	6647	6019	9444	9717	9590	8928	9981	10192	7764	12061	8808	10672	12757	12848	11226	16440	11668	11457	12509	12654	9720	12853	11395	14020	17603	13863	16799	14644	13556
	α-terpineol	6377	6063	6691	7679	7170	7304	7149	7127	7171	6956	7151	7930	8380	7109	7555	7012	7971	7255	6581	7020	7628	6623	7749	6480	7107	7324	6847	6572	7380	8412
	β-caryophyllene	5117	5425	5286	6363	5644	6004	6522	6380	7207	6475	7284	8411	6788	8986	9051	7963	9385	12364	10459	9678	17343	9671	11754	9907	16605	15288	16195	15809	13061	12977
	β-ionone	7051	7963	8084	8179	8456	7621	7891	8214	10941	7486	8333	7729	7166	7631	8078	13786	8045	7592	7676	7139	7314	6374	6355	6393	6677	6433	6722	6744	6442	6578
	4-isopropyltoluene	7244	8974	9151	8883	8922	8958	7592	6723	7351	6920	7774	7302	7780	7649	7941	6330	8293	7991	6493	6423	6689	5419	7344	6052	6795	8973	7227	8723	7567	6306
	benzaldehyde	6748	7004	6492	7245	7115	7374	6061	6132	7040	7119	7198	8488	6689	6820	6663	6039	7567	5952	5985	6868	6969	5390	5637	6081	7493	9048	6239	8583	7861	5961
	caproaldehyde	7058	6495	6761	6839	6210	6737	6250	6285	6245	7860	6318	6460	7929	6952	5745	6197	6258	6135	6889	6127	7279	6363	6530	5971	6197	6677	5953	6241	6216	6243
	(Z)-3-hexenol	6275	5762	6097	7853	8652	8403	6992	6382	6355	6419	7196	6808	6561	6490	6439	6242	6220	5811	5437	6035	6831	6974	6042	5510	6021	6159	6506	6648	5435	5963

## Sheet: OBP2
		OBP2			Fluorescence competitive binding assay
		2			4			6			8			10			12			14			16			18			20
	BHT(2,6-di-tert-butyl-4-methylphenol)	17266	17491	17183	14970	16711	16317	15662	16983	15070	15947	15853	15572	14398	14630	15652	14856	14795	14083	12632	13317	14001	12208	12493	12411	12799	12350	11202	12923	12557	10378
	naphthalene	21005	21502	19080	24365	22710	24844	22191	22417	22519	23158	21663	20781	20596	20292	20233	19697	18134	19454	17572	18013	17420	16408	15544	15169	18334	23371	18960	17296	16882	15413
	lauryl alcohol	17977	18256	18222	21586	19639	16260	18208	18064	15812	16946	12445	14953	16387	15939	15218	16171	15043	14391	14286	13952	14683	13014	12749	13096	12746	12759	12788	13087	12766	13106
	didecyl ether	18915	20597	23440	24181	28014	25410	34688	31794	34987	33082	40303	37763	37285	44653	45169	40538	46457	42564	47395	46610	49253	41133	50168	50416	50240	52962	54896	51479	53666	47381
	benzophenone	16222	16950	16565	15645	17125	16794	16160	16241	16073	14263	14653	15131	13747	14449	15134	12905	13209	14417	11252	12436	12979	11787	11767	11673	12436	11331	11969	11423	12242	11724
	n-Hexadecane	13495	16165	17504	14292	14770	18258	13188	14373	14976	12682	13401	14572	12390	12956	13308	11320	12682	13112	11586	11754	12906	10605	10448	11282	14498	14899	13250	13545	12591	11415
	MH(methyl hexadecanoate)	36028	29538	32173	32085	39967	36772	51385	38065	41844	39886	44063	42977	53038	51904	31312	66556	51896	78968	59847	56230	65733	57526	53371	59678	69952	81927	73816	72726	69859	85793
	n-octadecane	22088	18683	19796	22227	21034	22529	22620	20809	24859	22235	21135	22654	23550	22474	20461	24276	21111	21373	23028	21327	21239	18660	19708	19350	24040	25474	26650	24631	21130	21384
	cedrol	24497	23498	23591	27085	27496	25040	30107	26969	25579	26802	26446	25979	26972	25158	26522	24638	24959	25011	25754	26325	24806	22837	21773	21108	27379	25169	23516	25091	24420	23245
	Plant alcohol	15935	15877	16010	16483	17483	15472	19539	15243	16407	19867	20728	17103	20161	19779	18765	19327	19917	19157	20768	19570	20399	18977	19385	18242	20374	20001	19071	20399	20700	18461
	DA(diisobutyl adipate)	18255	18056	17857	17231	17998	18274	16096	17472	18707	16149	16678	16908	15320	15081	16366	14706	15645	15214	14108	14696	15283	14285	14484	14085	14063	14665	14360	13793	14314	13272
	2-heptanonol	18612	18747	19681	19302	19993	20683	18811	18736	18774	16468	16720	16981	16986	17111	16240	16820	17596	18083	17387	16676	18097	16472	16454	17500	16574	16302	16787	15630	15665	15648
	n-tetradecane	17681	15844	16950	17519	20288	20488	19784	21064	19193	20311	19912	20694	21153	20155	21164	17882	20189	20719	19553	20680	20531	20438	19246	20069	24630	24806	23381	26164	20955	19728
	n-nonadecane	22779	20086	21018	21686	22088	20918	24120	23625	22791	22496	24832	23266	22518	23515	22157	23732	24191	22198	22713	20356	21973	21871	23043	23038	25864	26767	25338	26712	23676	24323
	(+)-limonene	18785	17646	18955	19168	18029	18599	18726	17846	18376	17673	18323	17474	16329	16489	16675	16493	16176	16335	13873	13950	13912	12506	13445	12627	13201	13156	13110	12573	13554	12438
	linalool	22475	19579	19869	18324	21526	18676	20143	19481	21546	18566	19629	19018	17948	18880	17034	17194	16713	16298	15375	15983	16080	16976	14612	14664	15874	15679	13833	14349	13969	12873
	2-heptanone	19792	17859	20079	17338	18012	20388	17013	18530	19352	15771	11853	17932	15741	17236	17972	14577	14468	15583	14055	13126	14409	12777	13653	13817	17551	16085	21813	14165	14167	13571
	acetophenone	18213	17695	18887	18465	18805	18729	17576	17836	18066	15752	18865	17007	16925	17786	17356	16049	16437	16824	15270	15647	14905	15319	14300	16123	15075	15152	15228	14131	14026	13920
	benzoic acid methylester	20302	19349	19856	20922	22649	23660	19982	19598	20363	18016	17876	18155	17866	16967	17417	14659	16003	15331	15808	14578	16066	13829	13659	13740	13696	13929	14161	14205	14645	13761
	nonanal	22495	22840	21233	23391	22604	23347	22973	22972	22119	20829	21110	19166	18739	19572	20059	18220	17338	19313	18807	18093	18015	15898	17144	15877	16375	13674	18894	16296	16765	17962
	2-nonen-1-ol	23899	21462	22264	25374	25147	24357	25139	24429	24096	22380	22288	21248	20934	21198	20778	19074	19350	18397	16875	19948	17641	16016	16681	14367	17119	16819	15979	16047	15694	13725
	tridecanal	15375	16260	17114	15250	17637	17949	17180	18194	18919	15100	16066	16289	16213	16940	17695	14964	18259	16491	16687	18876	18074	17882	16512	18645	18334	17452	17782	16896	19235	19174
	octanal	19179	16653	19027	18170	19771	20766	19862	19512	20651	15792	18755	20463	17421	18400	18628	16986	26722	18513	17500	18527	15051	15983	17600	16529	18709	20674	18464	19401	17294	16214
	n-hendecane	13775	13769	13734	13631	13783	13500	14480	14028	13866	14049	14101	13901	14583	14099	14077	12819	13447	13211	12583	13279	13266	12291	12273	12414	15293	14599	14178	14271	14231	15281
	cyclohexanol	20258	18511	18768	17006	17312	19296	17760	19185	18943	16983	16921	18381	16551	16106	17116	12653	16542	15003	14815	15068	14859	15306	13071	13046	15697	16234	16085	15959	14904	13122
	(E)-2-hexenol	18290	18447	18531	17418	17308	17228	16794	16314	16504	15464	15780	16125	15191	14875	15159	14300	14543	14192	13523	13764	13447	12677	12355	12095	11796	11817	11503	11621	11220	11057
	n-octane	18817	16925	16813	17604	17269	15635	16307	16391	15566	15494	15122	16014	15063	14978	15010	12606	12327	12885	12907	11889	12746	11757	11955	11106	11096	11451	11415	12132	10679	10932
	nerolidol	16746	14676	15441	14875	15827	16107	14243	15150	15095	12994	13858	14632	12524	13543	13950	11798	13085	12945	12191	12517	12178	11027	11256	11449	11299	11344	11251	11544	11076	11172
	α-farnesene	15175	15154	16258	15758	17105	16490	15945	16570	19054	15963	18724	18059	16134	18215	19226	15563	19243	19003	19071	18512	18689	17244	19263	18663	23408	23725	20804	16894	20680	19308
	α-terpineol	18212	17771	19569	20390	18924	19735	19485	20387	20572	16903	17555	17959	16415	15491	17367	14309	15826	15705	15282	15181	14363	13073	13018	13539	15519	15960	15297	14913	14580	12894
	β-caryophyllene	11458	11327	11281	12040	12315	12582	13825	12794	13738	13150	13647	14723	16274	13413	15514	16497	15342	16204	16950	15785	16267	16569	16590	16267	20111	21295	20566	21451	21222	20042
	β-ionone	20663	19168	19828	20326	19347	18863	19895	18583	19617	17627	19078	16731	16901	16412	15901	15640	15758	15363	13711	13915	13962	12366	12873	12910	12338	12028	11737	11557	10983	11423
	4-isopropyltoluene	17529	17068	16667	17068	16662	16270	17127	17348	16845	17260	16330	16495	16487	17551	16673	14433	15818	14693	14333	14565	13503	12972	13456	13282	13043	13102	13475	13105	12354	13093
	benzaldehyde	15507	14848	15027	14937	13962	14585	13559	14529	14868	13310	14622	14449	13559	13459	14101	13500	13742	13318	12764	13284	13618	12066	12546	12131	11847	12489	12075	11984	12356	11918
	caproaldehyde	19948	17721	20397	18968	18911	20133	20477	18306	21619	17546	19283	19094	16315	17446	18120	15600	16015	15598	15415	15014	15552	16559	13446	13014	16224	16658	15875	15466	14819	14364
	(Z)-3-hexenol	19770	19248	18506	19551	19781	18404	19561	18769	17857	18896	18816	16878	17416	17439	16747	16106	16534	16305	14820	14819	14820	13168	12294	13106	12788	12466	12554	12993	12815	12410

## Sheet: OBP3
	OBP3			Fluorescence competitive binding assay
		2			4			6			8			10			12			14			16			18			20
	BHT(2,6-di-tert-butyl-4-methylphenol)	62922	62019	61313	80496	109930	48944	58503	58107	50633	41822	72799	53759	69788	72654	85946	60000	90914	74114	74285	75475	71382	52587	87313	65294	52719	70169	103842	122349	93664	80933
	naphthalene	99229	86961	92264	97193	95605	87600	102900	102445	98166	100522	107674	104095	49630	50618	48648	46251	47333	45186	39681	44579	42492	42940	41521	40287	51522	51973	51748	50731	60428	55580
	lauryl alcohol	67563	64113	67485	70812	72838	74184	65634	64114	68940	62878	67093	68072	60134	69541	65795	68479	64625	78735	60140	40039	67409	38861	39269	45097	51398	59369	52474	68555	48789	43446
	didecyl ether	87733	85025	77897	115777	106868	104692	125530	125631	129726	107521	145667	147221	173091	157740	127122	158103	182941	142916	176147	111843	160442	151941	158990	157774	173084	168625	167342	193319	125518	175321
	benzophenone	66323	67865	69406	72270	71733	72815	57537	56825	55208	58199	53071	55635	54477	51518	50551	55084	52185	53632	52805	53281	53058	41260	41464	41332	39853	41331	40577	39610	40773	38426
	n-Hexadecane	69046	56769	63691	61024	72407	63576	62953	54664	55739	48630	46017	57385	48455	41384	49192	44417	51591	51023	42917	40156	40042	37264	50015	45340	66503	59244	47400	55843	55740	43544
	MH(methyl hexadecanoate)	79169	74941	94761	75066	75962	116353	80726	113361	131059	127533	115294	124955	151439	140422	180514	128094	97542	122147	143468	130975	143763	147668	180253	155136	151347	96227	180613	179130	144685	179646
	n-octadecane	44756	46756	45756	44765	44970	45189	56655	51780	54218	56206	55200	54212	105189	108079	109909	109051	110510	104814	104242	103301	109995	96286	114978	85581	113407	123942	62401	54560	56227	56504
	cedrol	55754	49842	56462	68851	68657	83563	77285	86181	100023	86444	86480	86528	98647	101699	124352	107439	105795	90567	124768	101594	116276	81951	95706	104699	130597	114825	98253	111183	106493	98789
	Plant alcohol	81785	76872	83999	101881	87909	87470	71457	61006	51881	71819	64171	69972	63459	67080	84824	64327	73125	73637	85412	71741	71210	78313	80279	70309	77162	77902	55555	68113	75065	101895
	DA(diisobutyl adipate)	60413	65968	63200	61250	61185	61320	60246	58949	59593	52502	56703	49181	59611	55127	57362	47975	49504	49931	42590	46739	44665	36927	42551	39754	35693	43209	41553	42100	41400	42823
	2-heptanonol	45232	45869	44594	45996	44453	43020	47391	47743	47567	48801	50407	49604	51610	62768	47878	54498	52011	51877	42842	42142	42842	41166	44357	42754	42621	43724	41536	45786	37456	39383
	n-tetradecane	83183	87404	88774	91510	89708	93194	97532	94447	95269	93074	89520	89172	92952	88800	85833	87947	90919	89332	86216	85989	89098	77694	82013	80619	91776	100406	90755	89755	85247	85349
	n-nonadecane	81706	89895	90926	92466	96932	93745	84153	91141	92184	88550	83959	85903	84955	81246	84347	79099	81968	85076	78930	78937	80614	67688	71739	72376	93819	87996	91999	87679	80588	71651
	(+)-limonene	51848	49151	50500	50802	50041	48259	50158	49686	49223	48228	50693	49450	46402	47349	46178	39434	38976	40288	38805	38818	38804	34272	34325	34139	33102	34070	35044	32236	31361	31799
	linalool	45666	44893	46206	43749	45410	42660	44364	44740	45115	41369	43894	46339	41142	43565	45619	38618	37689	38140	35045	37361	38462	32691	35765	36425	35273	34668	35335	34176	32081	34822
	2-heptanone	37101	37506	37304	36141	37871	37816	36419	39158	37789	33665	34797	35932	33290	35900	35256	29962	33001	33859	28260	30707	32190	28891	29426	29159	26989	27471	26506	26994	26547	27440
	acetophenone	34223	34200	33767	34565	34966	35111	33473	32986	33557	31804	31815	33904	31933	33856	32393	28357	30958	31303	30291	29441	31149	26096	27512	26789	36577	32045	32081	29304	29350	25941
	benzoic acid methylester	65046	56813	65508	67380	59779	65465	60647	61139	65169	62761	59088	65223	58066	60267	58488	53979	46844	52174	52567	46884	49119	43090	45767	42573	48410	52387	52599	47608	41929	45047
	nonanal	61166	61638	64447	63416	64552	59405	55740	58561	59455	58358	53959	58376	51490	57535	53641	51816	53317	52476	50240	49815	48142	46199	48600	42686	47759	45050	48665	47298	41425	41649
	2-nonen-1-ol	69777	64977	64069	69897	66654	59281	72805	63593	63408	68908	64822	61456	63843	54968	55110	59021	51372	52724	52703	46147	50940	47036	45518	44907	49989	48773	43710	40319	40656	42300
	tridecanal	42528	41583	43473	41210	39055	38819	40763	42069	38391	40006	42611	39486	37952	40731	37192	41103	37710	38844	39070	39869	40524	39064	38170	38620	39885	40160	39604	39750	40400	40150
	octanal	68575	67242	67984	64299	63882	65677	63214	64264	71883	56987	54777	62435	56513	56201	65155	55112	58995	53063	51702	52973	56636	47206	51931	50397	54350	59148	62323	48786	51913	45060
	n-hendecane	74152	72365	72059	77402	81799	77600	79862	82180	72867	73959	76680	68556	74938	80983	75877	71318	75448	71285	70629	72724	74851	63137	66714	63682	73714	82385	76604	75970	66519	62854
	cyclohexanol	73467	78493	77746	78452	70026	82856	79407	77940	78195	71546	83168	84706	73852	75338	78193	65457	72548	71432	60072	60001	71583	61622	57596	60550	75606	79879	73633	63397	61447	55682
	(E)-2-hexenol	55419	52631	56435	52848	53720	53070	56485	54348	51437	53820	44741	53024	50999	49511	49866	51314	45497	46649	46992	46379	46282	39521	39562	39433	45227	50180	45511	47692	45313	40014
	n-octane	68170	67677	64610	67293	62720	65655	76553	64631	57162	71829	61798	56284	59554	55292	53530	55099	48687	52349	54529	46904	51749	48833	47113	45049	45841	47813	46502	46899	47179	42858
	nerolidol	55523	54254	55950	52204	49599	49733	48530	49919	47140	48179	44521	46350	42323	44632	41414	39705	38987	37616	34880	34317	34633	32423	30011	29519	30169	30976	30764	29092	31304	30368
	α-farnesene	35042	35938	36236	33936	35041	36163	30371	31101	32222	32781	31040	32847	31032	32369	33307	29013	34433	32292	31092	30872	34922	33838	32037	30214	37931	38340	38776	37363	39141	38102
	α-terpineol	41927	42538	43146	40833	40011	41655	42160	41392	42949	37611	37369	39854	32220	32701	33181	30392	29567	30934	29784	30310	29247	24410	25726	27469	26293	25033	26983	28495	26490	25496
	β-caryophyllene	59910	62614	72673	64089	65130	67441	62365	65722	64412	61822	63261	63413	59908	63429	67892	56993	56771	64941	61557	60060	62301	39308	53990	51354	76113	82456	70640	72444	66812	61866
	β-ionone	49137	48472	49801	47017	46358	43965	39740	42626	39389	37430	36910	36009	35904	33157	32677	30694	33051	28374	26192	26407	26489	23097	23904	24653	23846	23655	23476	21994	24647	23321
	4-isopropyltoluene	76459	72745	73014	75454	75539	76517	77021	76644	73341	70448	67651	65820	65984	64535	66083	59229	62714	59705	51855	54624	58162	47509	50343	51946	53658	55976	54775	49838	49582	48822
	benzaldehyde	45330	44709	45950	42404	44063	46652	42957	46006	45764	41484	44807	44761	42296	40919	43670	40362	40474	40259	36140	35545	34940	32608	31985	31371	31185	31705	30913	30533	30370	31330
	caproaldehyde	54416	49651	50603	47681	49063	52745	47400	49699	51997	47134	47465	47300	47300	47488	47127	41818	40552	41184	39535	41064	41296	37737	36118	39070	41678	41915	41872	43199	40517	41843
	(Z)-3-hexenol	48626	49734	49512	45649	45958	42870	41915	48260	45013	45442	45656	45548	40904	43831	42892	41218	40601	40113	34957	35609	37985	33728	34170	34618	37828	32491	33581	33910	32414	29949

## Sheet: OBP11
	OBP11			Fluorescence competitive binding assay
		2			4			6			8			10			12			14			16			18			20
	BHT(2,6-di-tert-butyl-4-methylphenol)	23825	22642	21527	20143	21258	22100	20464	20607	21862	19852	19956	20060	19539	18542	20536	18948	19227	18669	16147	16112	15881	16019	15985	16022	16028	15902	15995	15978	15860	15984
	naphthalene	34403	32473	34898	34130	34738	32492	35498	33550	32552	32155	35048	30051	30839	29352	29736	30215	28382	27824	26586	26869	27309	25698	25045	25361	25004	25141	24946	23792	23804	23815
	lauryl alcohol	24217	24290	24783	24290	24322	23442	24952	22901	24534	24078	21947	24599	22957	24005	23087	20961	21769	22579	19736	20687	20422	16888	20499	18999	18870	19005	19199	20952	19127	18042
	didecyl ether	43164	38605	37407	45394	44519	44324	52018	51596	52439	52547	53605	57390	53386	50348	61467	60450	60637	60823	64649	70642	65311	64270	67002	65982	78706	81987	75370	97463	75326	72923
	benzophenone	21450	21005	21027	20588	20654	20719	19889	20401	19317	19997	20308	18308	18532	18946	17435	17719	18881	17057	16744	17392	16199	16069	15955	16012	16341	15453	16084	15275	14432	14489
	n-Hexadecane	21809	24436	21028	21555	21532	20733	20973	20501	20737	20324	20139	20508	20121	20422	20353	19850	19980	19737	21701	22333	21069	21665	22169	22138	22525	23830	23178	23218	23600	23432
	MH(methyl hexadecanoate)	29421	25881	28224	30123	33254	33112	36335	36906	37537	38631	37383	37911	41192	43341	42267	42172	43002	44132	50939	48639	49789	53380	53280	53495	69760	71076	64769	67623	62432	62669
	n-octadecane	31124	31165	31082	31010	31130	30899	26414	32905	29894	27729	29971	31279	29221	29436	31039	26981	32241	28868	27521	30203	30415	28709	28254	29164	29699	28164	26628	26046	24149	23426
	cedrol	32664	32061	32191	30812	37566	35078	34551	34452	36785	32906	35488	34811	34631	35572	36351	32777	37222	35927	33134	35392	35226	32933	34203	33568	37284	38034	36646	39273	38740	33015
	Plant alcohol	16266	15087	17001	17687	17526	17848	16356	18409	17383	17184	18342	18652	18889	17441	20338	19011	18892	20835	21007	21377	20817	23140	21703	22422	27356	26038	25306	26659	25183	25906
	DA(diisobutyl adipate)	28052	24884	25998	25234	27203	25942	26005	24895	23079	23239	23328	24337	23466	24012	22919	20499	21796	19860	20110	20124	20151	18498	20828	20812	20721	21669	21849	20792	21117	20999
	2-heptanonol	32214	33277	35354	33125	35054	33696	31772	31091	33532	28812	31104	31825	28521	30054	29747	26176	26507	26325	24809	27546	28489	22169	21457	24839	29523	28673	27420	25385	25884	25605
	n-tetradecane	29943	27499	28054	30256	30866	29645	26462	29047	31220	26278	28884	31318	27323	28751	30741	30511	30637	30384	29980	30187	31537	25150	28430	29261	33050	34724	33545	33953	35669	33542
	n-nonadecane	39005	36085	36144	38725	39209	36494	38941	37869	35504	38326	38320	34260	39470	35190	34723	35740	35339	34546	33030	32494	31487	29383	30154	29504	32894	34140	29208	31537	29929	28655
	(+)-limonene	20185	20635	20374	19119	21150	19404	20124	20072	19868	18585	21246	19916	19564	19568	19649	19387	19954	20491	19217	19676	19052	18294	18202	18385	17514	18012	18287	16634	17062	17452
	linalool	34595	35145	35691	34126	38977	36540	35921	34102	34901	31879	34190	34940	32152	33920	34003	31331	31885	32147	27789	28913	26664	26184	25844	25199	30237	30011	30462	29291	29263	28048
	2-heptanone	24306	24787	25268	24848	24623	25072	24984	24187	25781	23438	23156	23719	22448	22213	22684	22134	22969	22151	21048	20368	20708	19801	20307	20932	20181	20256	20300	20105	20028	20212
	acetophenone	26535	26162	26541	25394	26325	27262	26264	26035	26502	25045	25714	24376	24885	24226	23566	21957	22135	20925	23062	21821	20452	19007	19354	17450	21957	23680	21455	23354	26458	24921
	benzoic acid methylester	27311	29257	28341	28195	27454	28935	25204	26496	27787	24731	24972	24489	24285	24217	24352	23537	23314	23760	19900	22587	21306	18401	18544	17724	22003	20975	22765	21640	22200	21920
	nonanal	31191	27026	27251	33062	32235	30749	33680	31560	31826	29344	31482	30513	29393	28581	27079	26945	26618	27193	24856	26161	27383	23278	23147	23455	27255	25416	25774	25007	22862	22028
	2-nonen-1-ol	37643	35290	44360	35859	39342	34938	34140	38169	36155	32705	34472	34378	32486	33152	33818	28113	29890	30957	27880	28227	28574	24059	25490	25182	30643	29725	31591	30015	28576	24669
	tridecanal	24967	25926	30699	25125	27382	26896	26493	26335	26650	24847	24250	25420	24577	24121	25032	26676	27183	26168	24529	23823	25235	23763	25792	24713	29957	29942	30678	31322	31721	27795
	octanal	24279	24939	29122	25640	28958	26788	25301	29174	26969	29061	28222	29900	27603	27689	19569	25318	27390	28182	26354	26978	26309	23481	24311	22273	28836	32227	28560	27143	27661	26182
	n-hendecane	27436	25403	32188	29413	28026	33638	33021	33682	34343	31948	30771	33124	30756	30287	30522	29262	31182	32197	28697	28336	31391	26235	27774	27525	34849	34941	33114	29304	30167	28561
	cyclohexanol	24375	24650	24939	24494	24823	24654	24316	24699	24500	24760	24220	24499	22885	23988	24498	23691	23225	24428	22556	23123	22199	21391	22093	21606	23329	23356	23748	23863	23927	23769
	(E)-2-hexenol	34795	32362	33570	31605	31826	31807	29600	28910	29255	27040	29546	25961	25687	25600	25774	25617	23726	24242	22896	21710	22816	19721	20050	20211	19470	19537	20671	20038	19843	19956
	n-octane	29315	29331	31569	28278	30015	31065	29774	29054	29894	27943	28064	27821	27525	26078	27163	24273	26556	26721	22920	23793	23357	19613	20535	20285	26966	26281	26291	26611	26798	25454
	nerolidol	32108	31162	30215	28342	28762	29181	25372	24386	25974	24916	25493	26070	22613	22095	23428	21169	22102	22210	20351	23661	21671	17887	19544	17889	23369	23675	24479	22182	24009	23801
	α-farnesene	31505	30088	28664	32002	31205	30085	31916	28741	31112	31638	32522	31984	34517	33120	33819	30046	30862	31678	31889	31807	32302	29199	29171	27676	36648	40474	36079	36041	35048	35313
	α-terpineol	29252	30685	32118	28869	31369	30942	28105	27021	30576	25898	26158	28412	27115	24221	26039	23153	22497	22406	22371	22254	22487	19119	17607	18419	25701	25030	24854	25268	25350	25312
	β-caryophyllene	23970	23335	21938	23122	24566	25482	23526	25770	26267	21931	24474	27203	23853	25460	25443	23639	23490	23358	23808	26534	25924	22662	23024	23415	30250	30294	30235	30296	30444	30224
	β-ionone	28050	27736	27612	28634	28801	26168	26910	26403	26657	23184	24499	24103	21871	21831	22447	20048	20727	21593	17047	18839	19615	15254	16765	16613	17103	17364	18167	16580	17841	17555
	4-isopropyltoluene	35978	29566	32252	30015	32067	31035	30703	29596	29854	26981	27991	25842	25875	25879	25958	23828	23071	23450	21639	22165	24226	19389	17044	20238	24841	23918	23440	24558	23570	24060
	benzaldehyde	25700	26420	26489	25103	25939	26917	24540	24263	26004	24810	23717	25921	21750	22655	24544	22377	22204	22549	20889	20823	20954	18305	18429	20008	18084	18788	18463	17844	18414	17540
	caproaldehyde	29622	27160	24651	27823	29657	29706	29000	25791	27264	26196	25787	26691	22993	24045	23459	23301	22698	22770	21327	20283	20685	18242	16904	18315	21574	21057	21178	19958	19749	19854
	(Z)-3-hexenol	23102	23122	23081	21959	22135	21783	21447	20794	21118	18781	21016	21554	18621	21154	19973	17455	20348	19925	17235	18458	18680	16257	15961	16778	15893	16090	15799	15616	15707	14975
